# Supplementary material for: Volunteer based approach to dog vaccination campaigns to eliminate human rabies: Lessons from Laikipia County, Kenya
Source: PubMed Central journal article supplement (PMC7331976; doi:10.1371/journal.pntd.0008260), 2020-07-02

BARUNTE MOSIANT - KIMATIJO - GROUP 5.

HOSPITAL

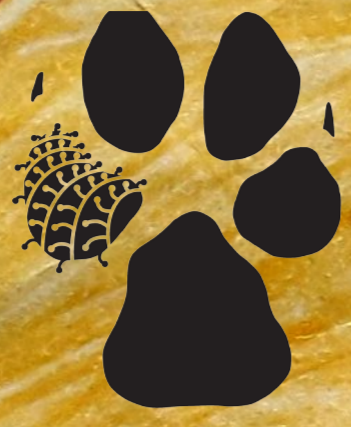

# LAIKIPIA RABIES VACCINATION CAMPAIGN

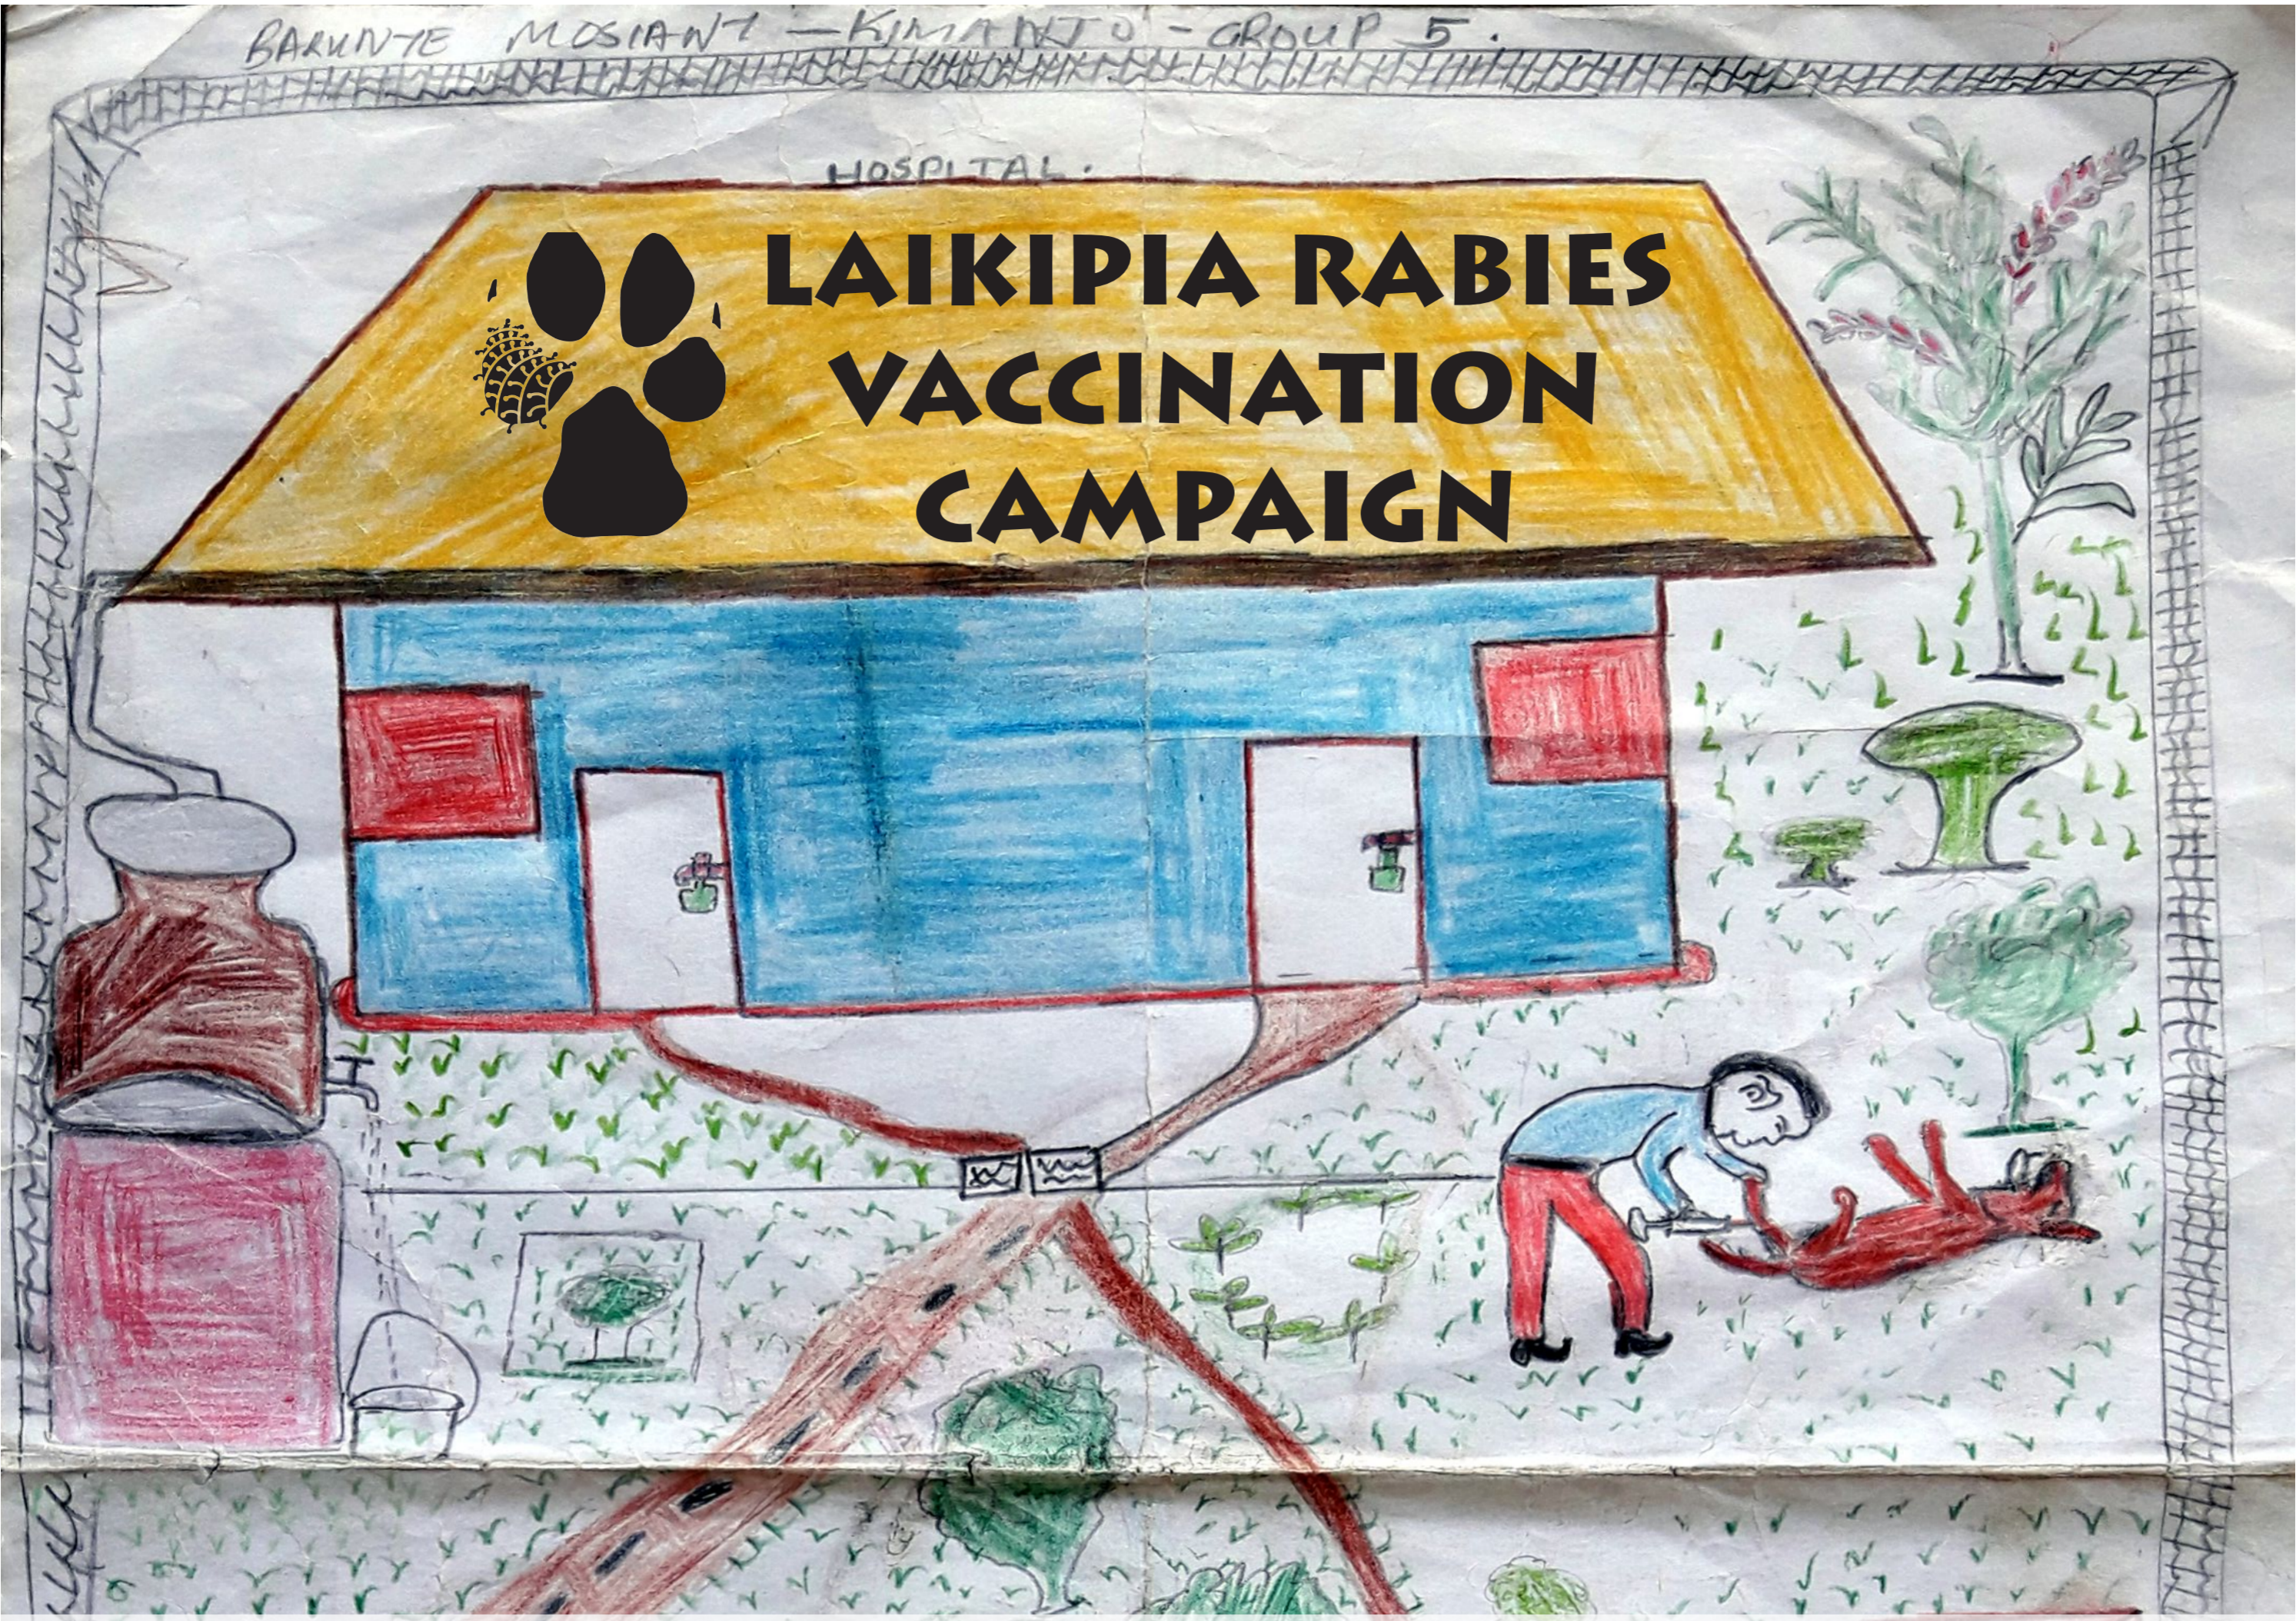

Tafadhali tusaidie kuzuia vifo vya binadamu  
vinavyosababishwa na kichaa cha mbwa.  
Protect yourself, your pets and wildlife.

## CHANJA MBWA YAKO! OKOA MAISHA!

# HAKUNA MALIPO! CHANJO NI BURE!

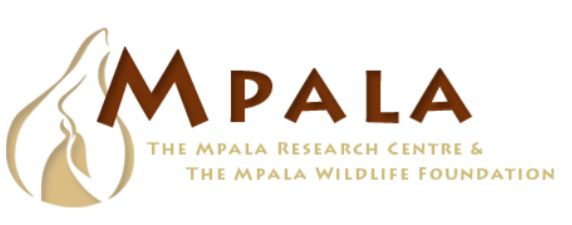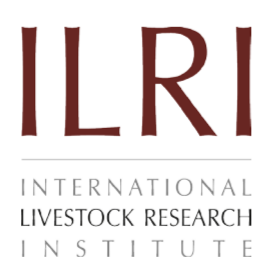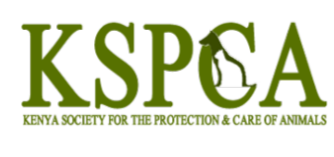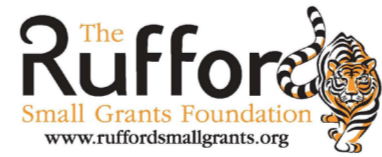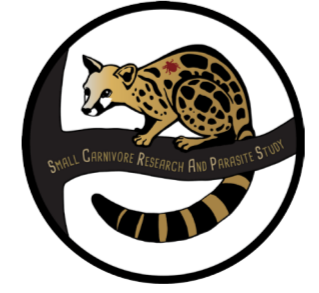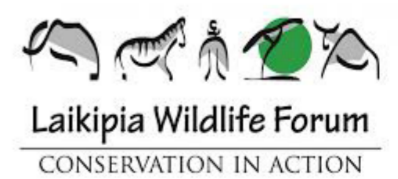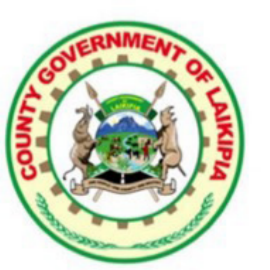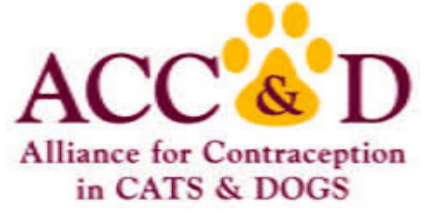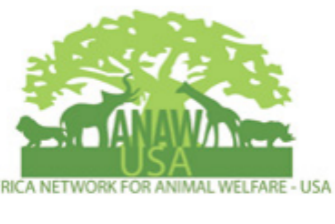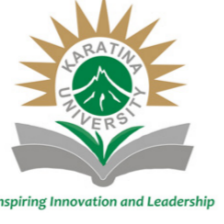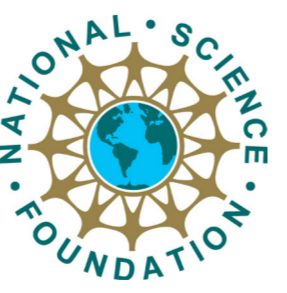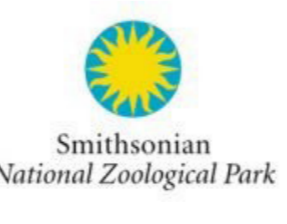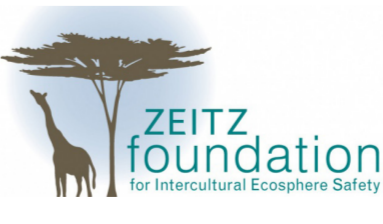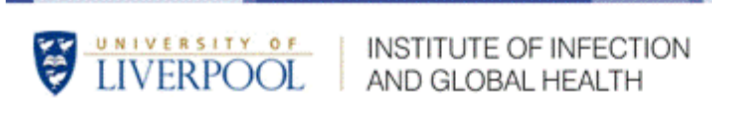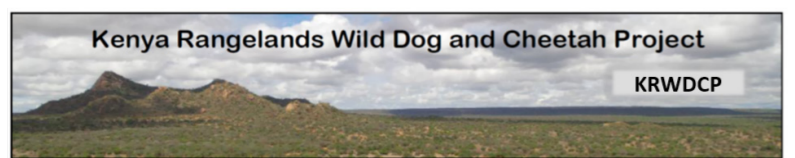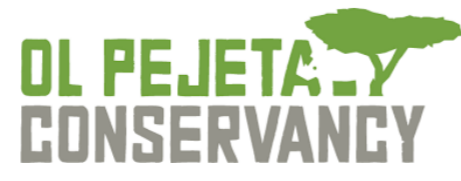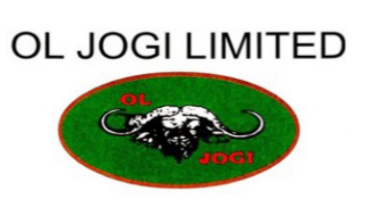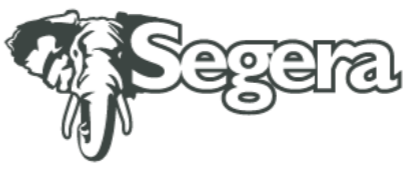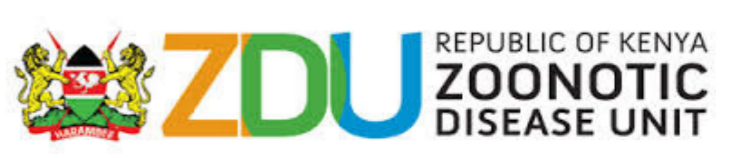

Supplement: pntd.0008260.s011.pdf [file pntd.0008260.s011.pdf]
