# Supplementary material for: Volunteer based approach to dog vaccination campaigns to eliminate human rabies: Lessons from Laikipia County, Kenya
Source: PubMed Central journal article supplement (PMC7331976; doi:10.1371/journal.pntd.0008260), 2020-07-02
Supplement: pntd.0008260.s009.pdf [file pntd.0008260.s009.pdf]

**Agro-Pastoral Communities. From upper L to lower R corner- Chumvi, Endana, Nanyuki, Ngobit, Tharua, and Thome**

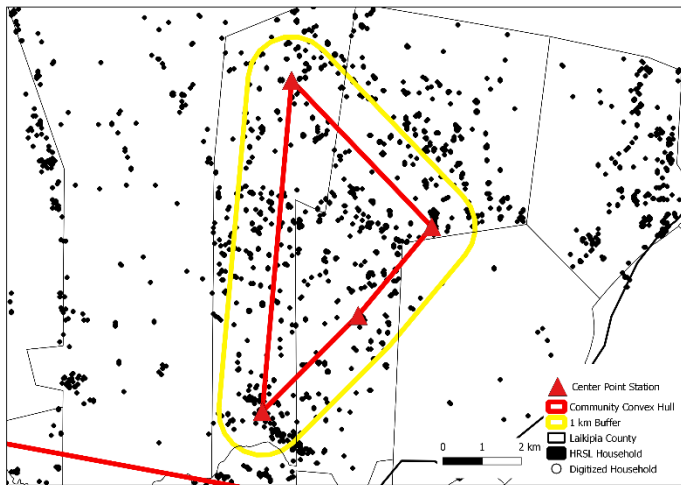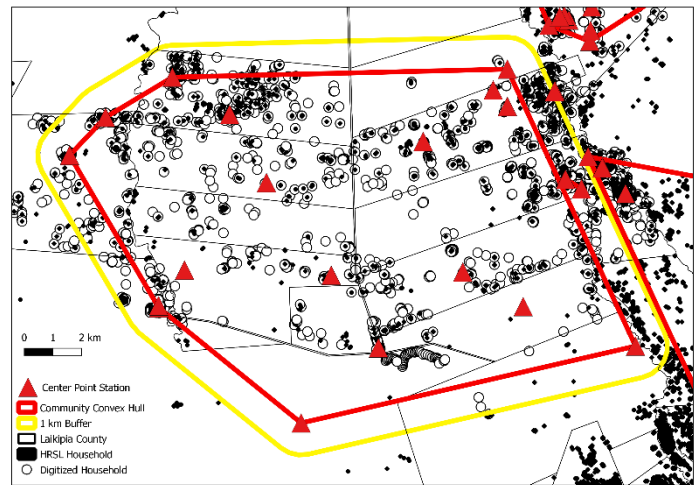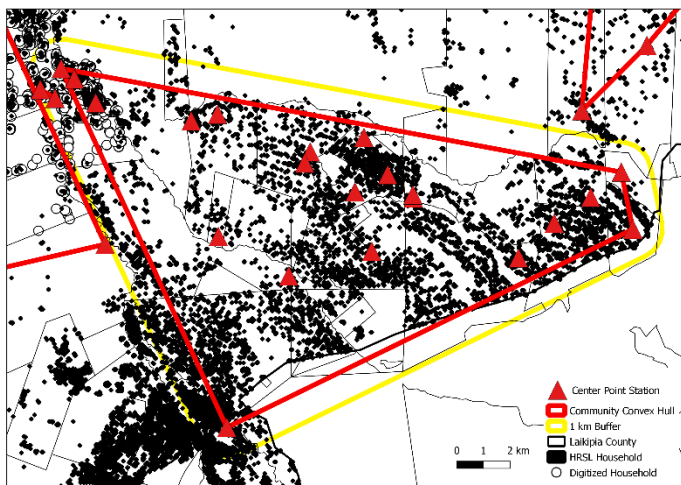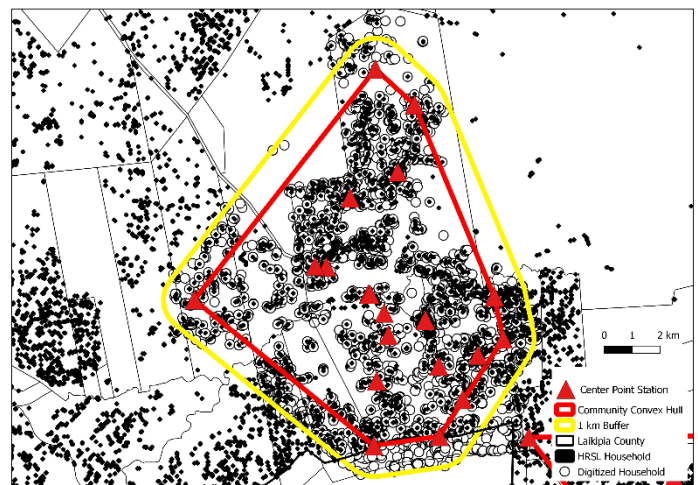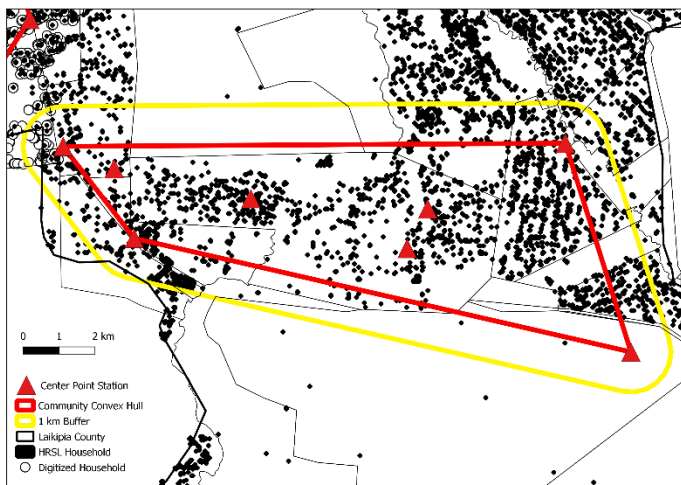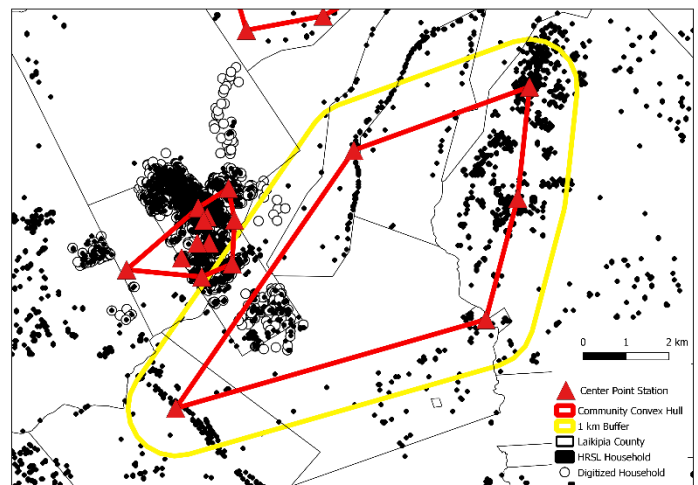

Maps were generated using QGIS 2.18.11 Geographic Information System from the Open Source Geospatial Foundation Project <http://qgis.osgeo.org> with layers sourced from original GPS coordinates in the field (e.g., central point vaccination stations), the World Agroforestry Centre's Geoscience Lab <http://landscapeportal.org> (i.e., the Laikipia County property boundaries), ESRI Data & Maps group <http://www.arcgis.com> (e.g., Laikipia County boundary), and the High Resolution Settlement Layer developed by Facebook Connectivity Lab and Center for International Earth Science Information Network - CIESIN - Columbia University <https://www.ciesin.columbia.edu> in 2016.

Pastoral Communities. From upper L to lower R corner- Il Motiok, Il Polei, Iingwezi, Koiya, Maramoja, and Mathenge

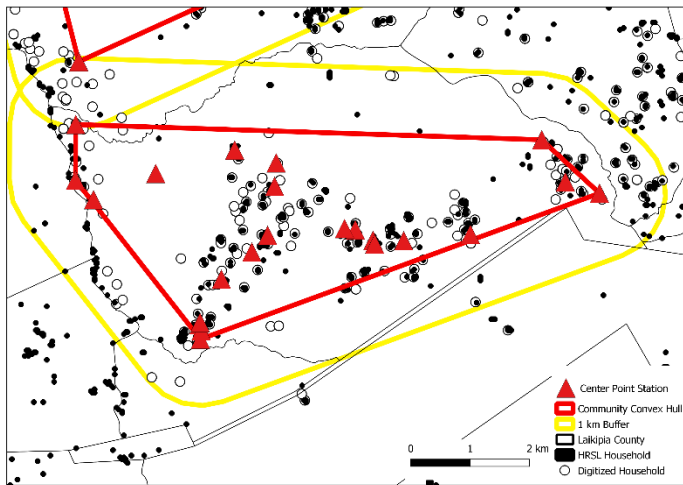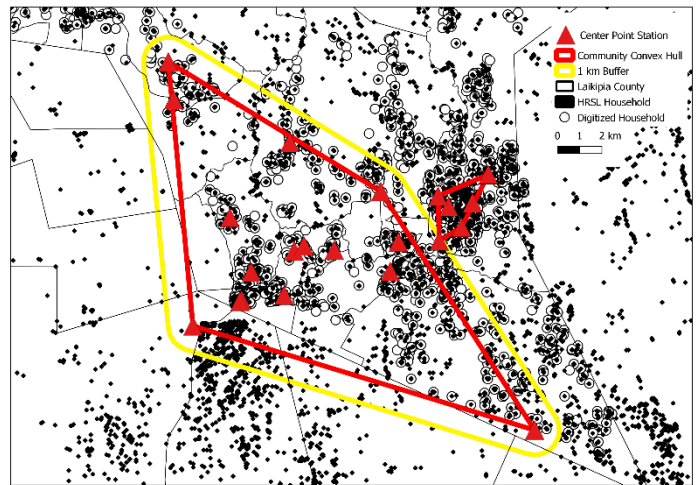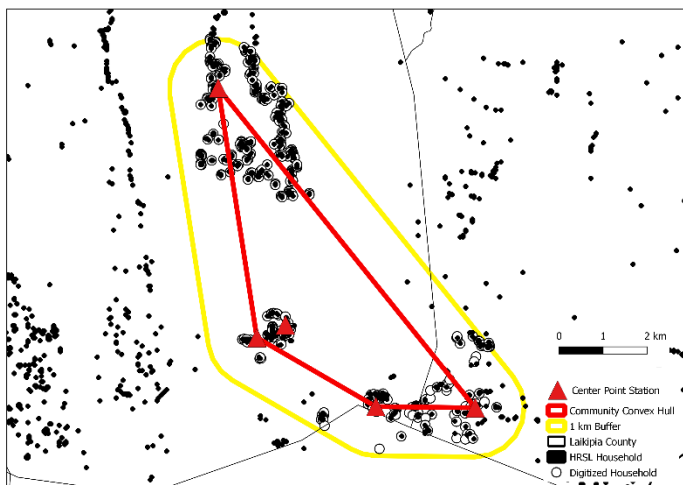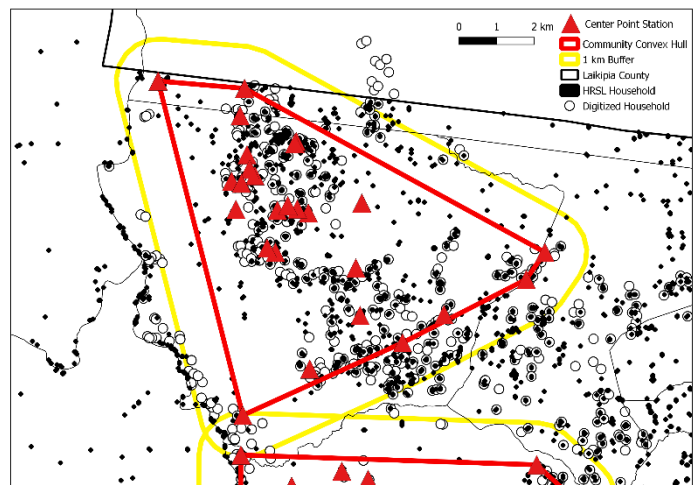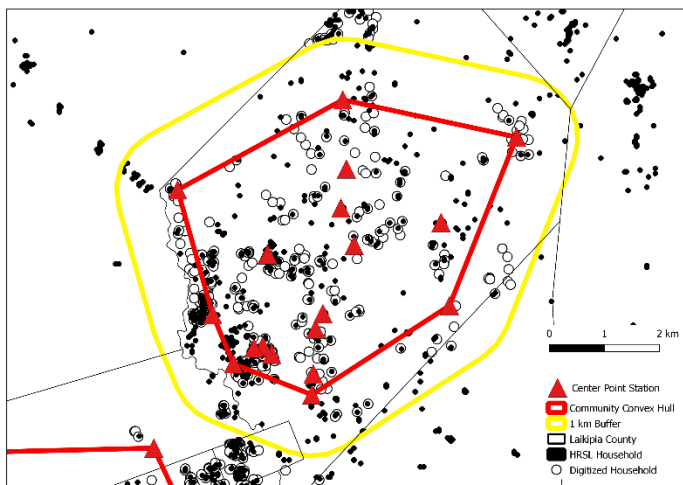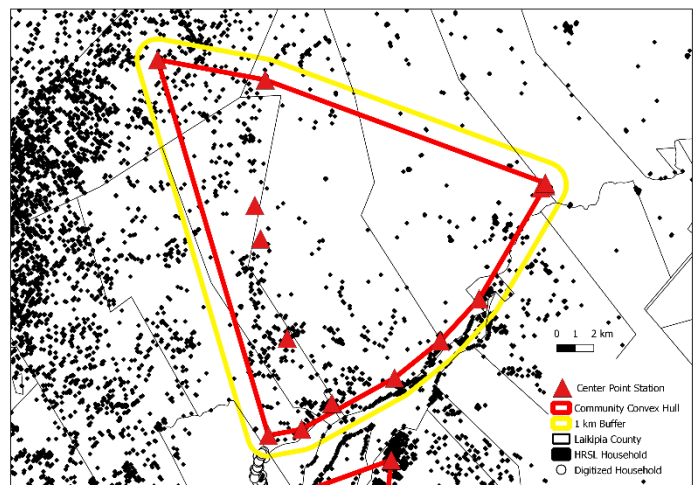

Maps were generated using QGIS 2.18.11 Geographic Information System from the Open Source Geospatial Foundation Project <http://qgis.osgeo.org> with layers sourced from original GPS coordinates in the field (e.g., central point vaccination stations), the World Agroforestry Centre's Geoscience Lab <http://landscapeportal.org> (i.e., the Laikipia County property boundaries), ESRI Data & Maps group <http://www.arcgis.com> (e.g., Laikipia County boundary), and the High Resolution Settlement Layer developed by Facebook Connectivity Lab and Center for International Earth Science Information Network - CIESIN - Columbia University <https://www.ciesin.columbia.edu> in 2016.

Pastoral/Permanent Communities. Top- Dol Dol, Lower- Lekiji.

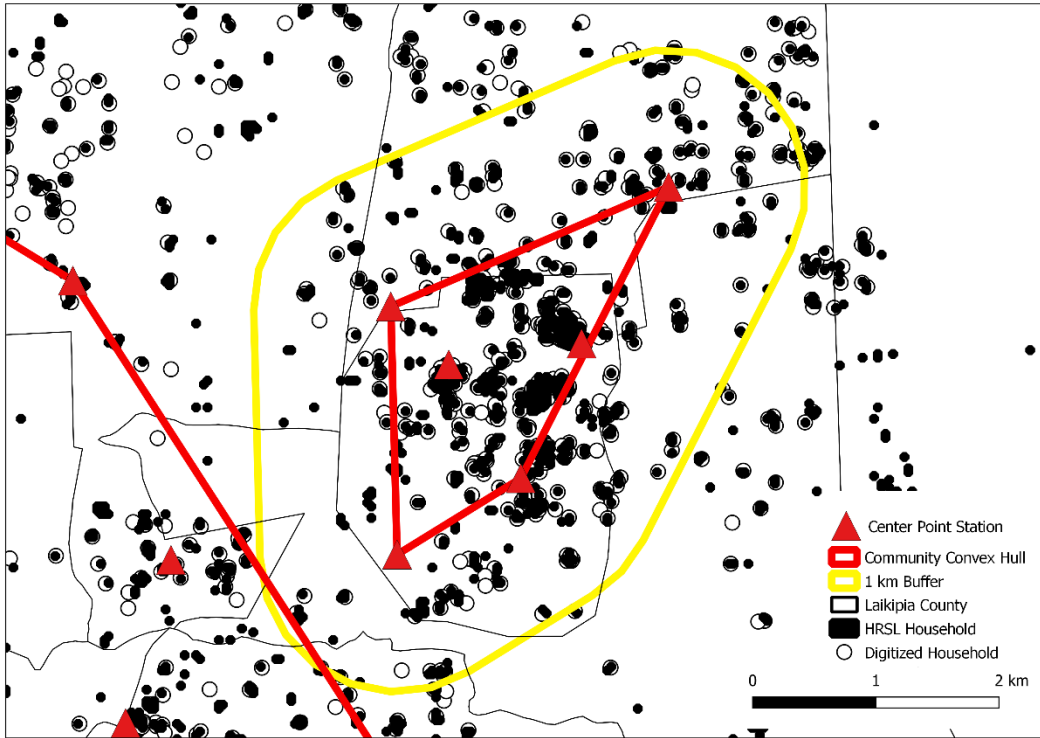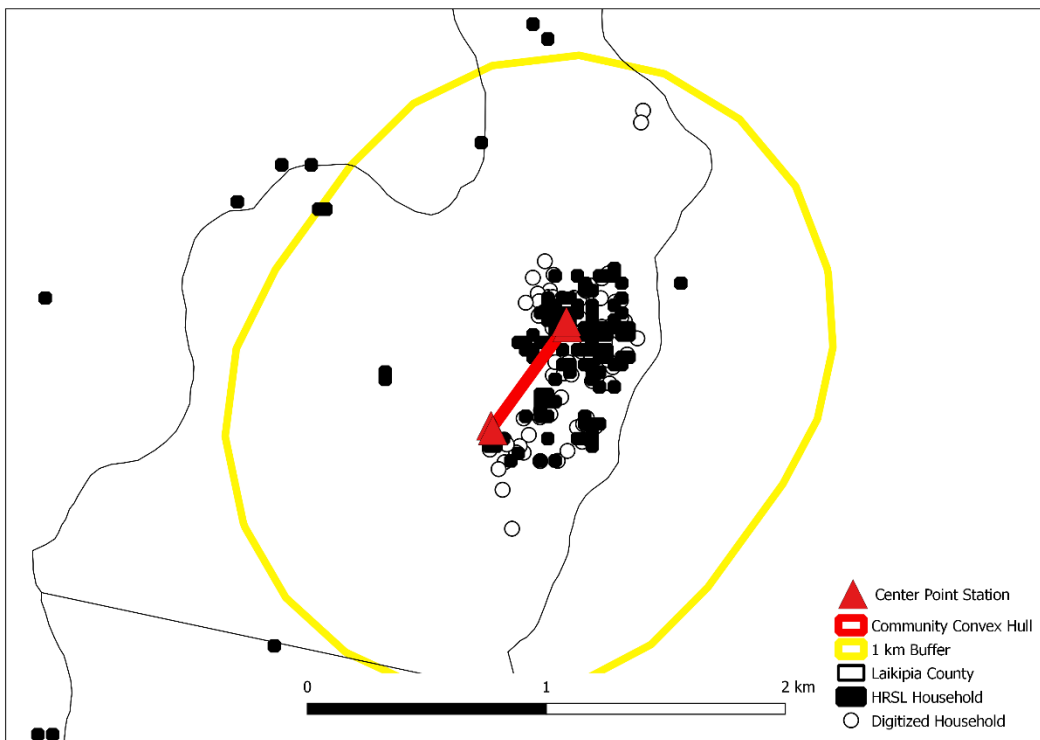

Maps were generated using QGIS 2.18.11 Geographic Information System from the Open Source Geospatial Foundation Project <http://qgis.osgeo.org> with layers sourced from original GPS coordinates in the field (e.g., central point vaccination stations), the World Agroforestry Centre's Geoscience Lab <http://landscapeportal.org> (i.e., the Laikipia County property boundaries), ESRI Data & Maps group <http://www.arcgis.com> (e.g., Laikipia County boundary), and the High Resolution Settlement Layer developed by Facebook Connectivity Lab and Center for International Earth Science Information Network - CIESIN - Columbia University <https://www.ciesin.columbia.edu> in 2016.

## Permanent Communities. Top- Juakali, Middle- Naibor, Lower- Rumuruti.

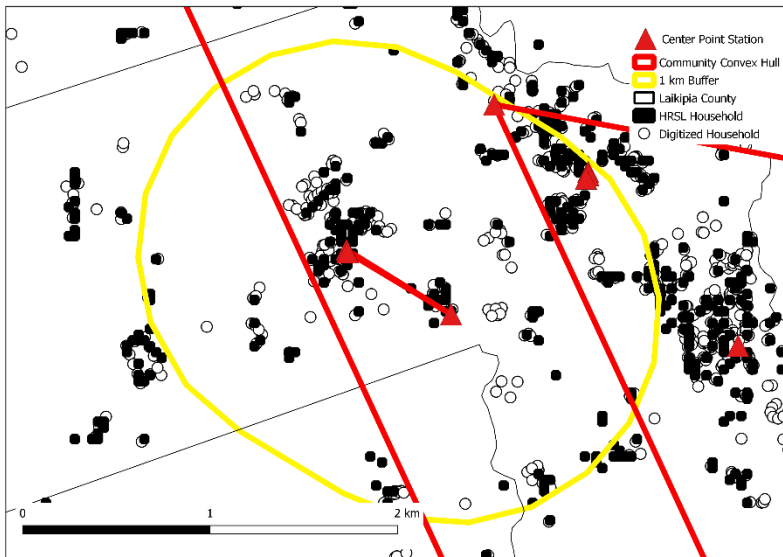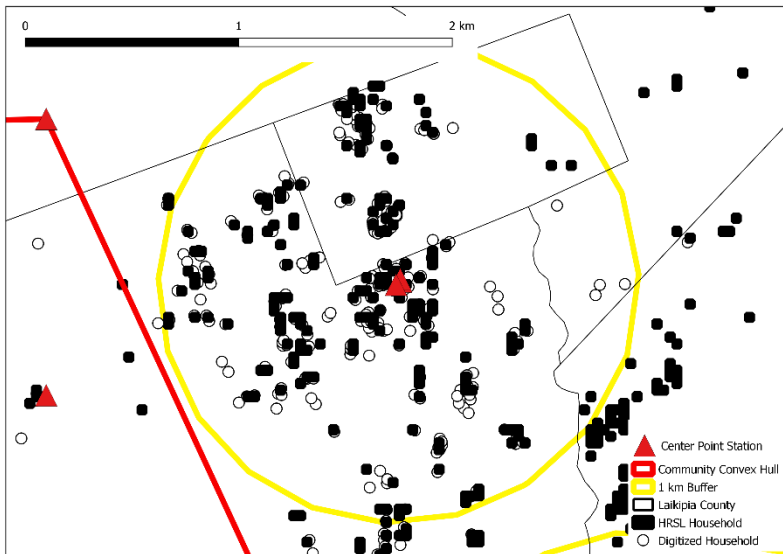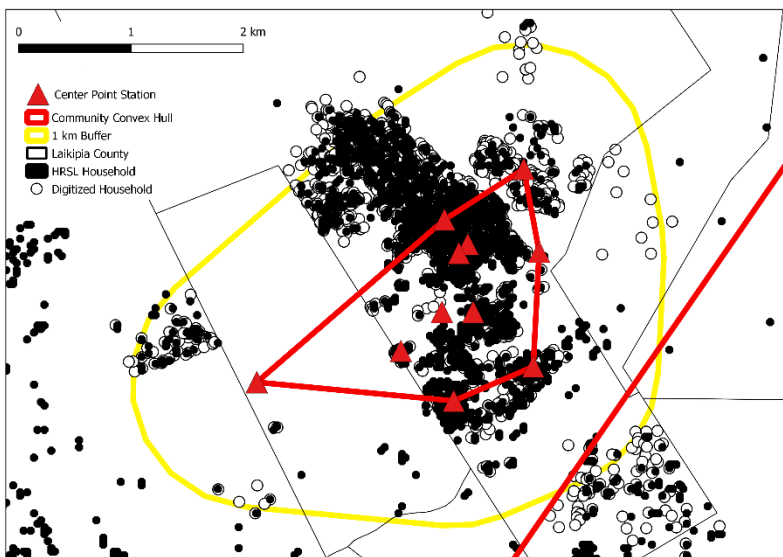

Maps were generated using QGIS 2.18.11 Geographic Information System from the Open Source Geospatial Foundation Project <http://qgis.osgeo.org> with layers sourced from original GPS coordinates in the field (e.g., central point vaccination stations), the World Agroforestry Centre's Geoscience Lab <http://landscapeportal.org> (i.e., the Laikipia County property boundaries), ESRI Data & Maps group <http://www.arcgis.com> (e.g., Laikipia County boundary), and the High Resolution Settlement Layer developed by Facebook Connectivity Lab and Center for International Earth Science Information Network - CIESIN - Columbia University <https://www.ciesin.columbia.edu> in 2016.
