# Supplementary material for: Volunteer based approach to dog vaccination campaigns to eliminate human rabies: Lessons from Laikipia County, Kenya
Source: PubMed Central journal article supplement (PMC7331976; doi:10.1371/journal.pntd.0008260), 2020-07-02
Supplement: pntd.0008260.s010.pdf [file pntd.0008260.s010.pdf]

# Je wajua utafanya nini ukiumwa na mbwa kichaa?

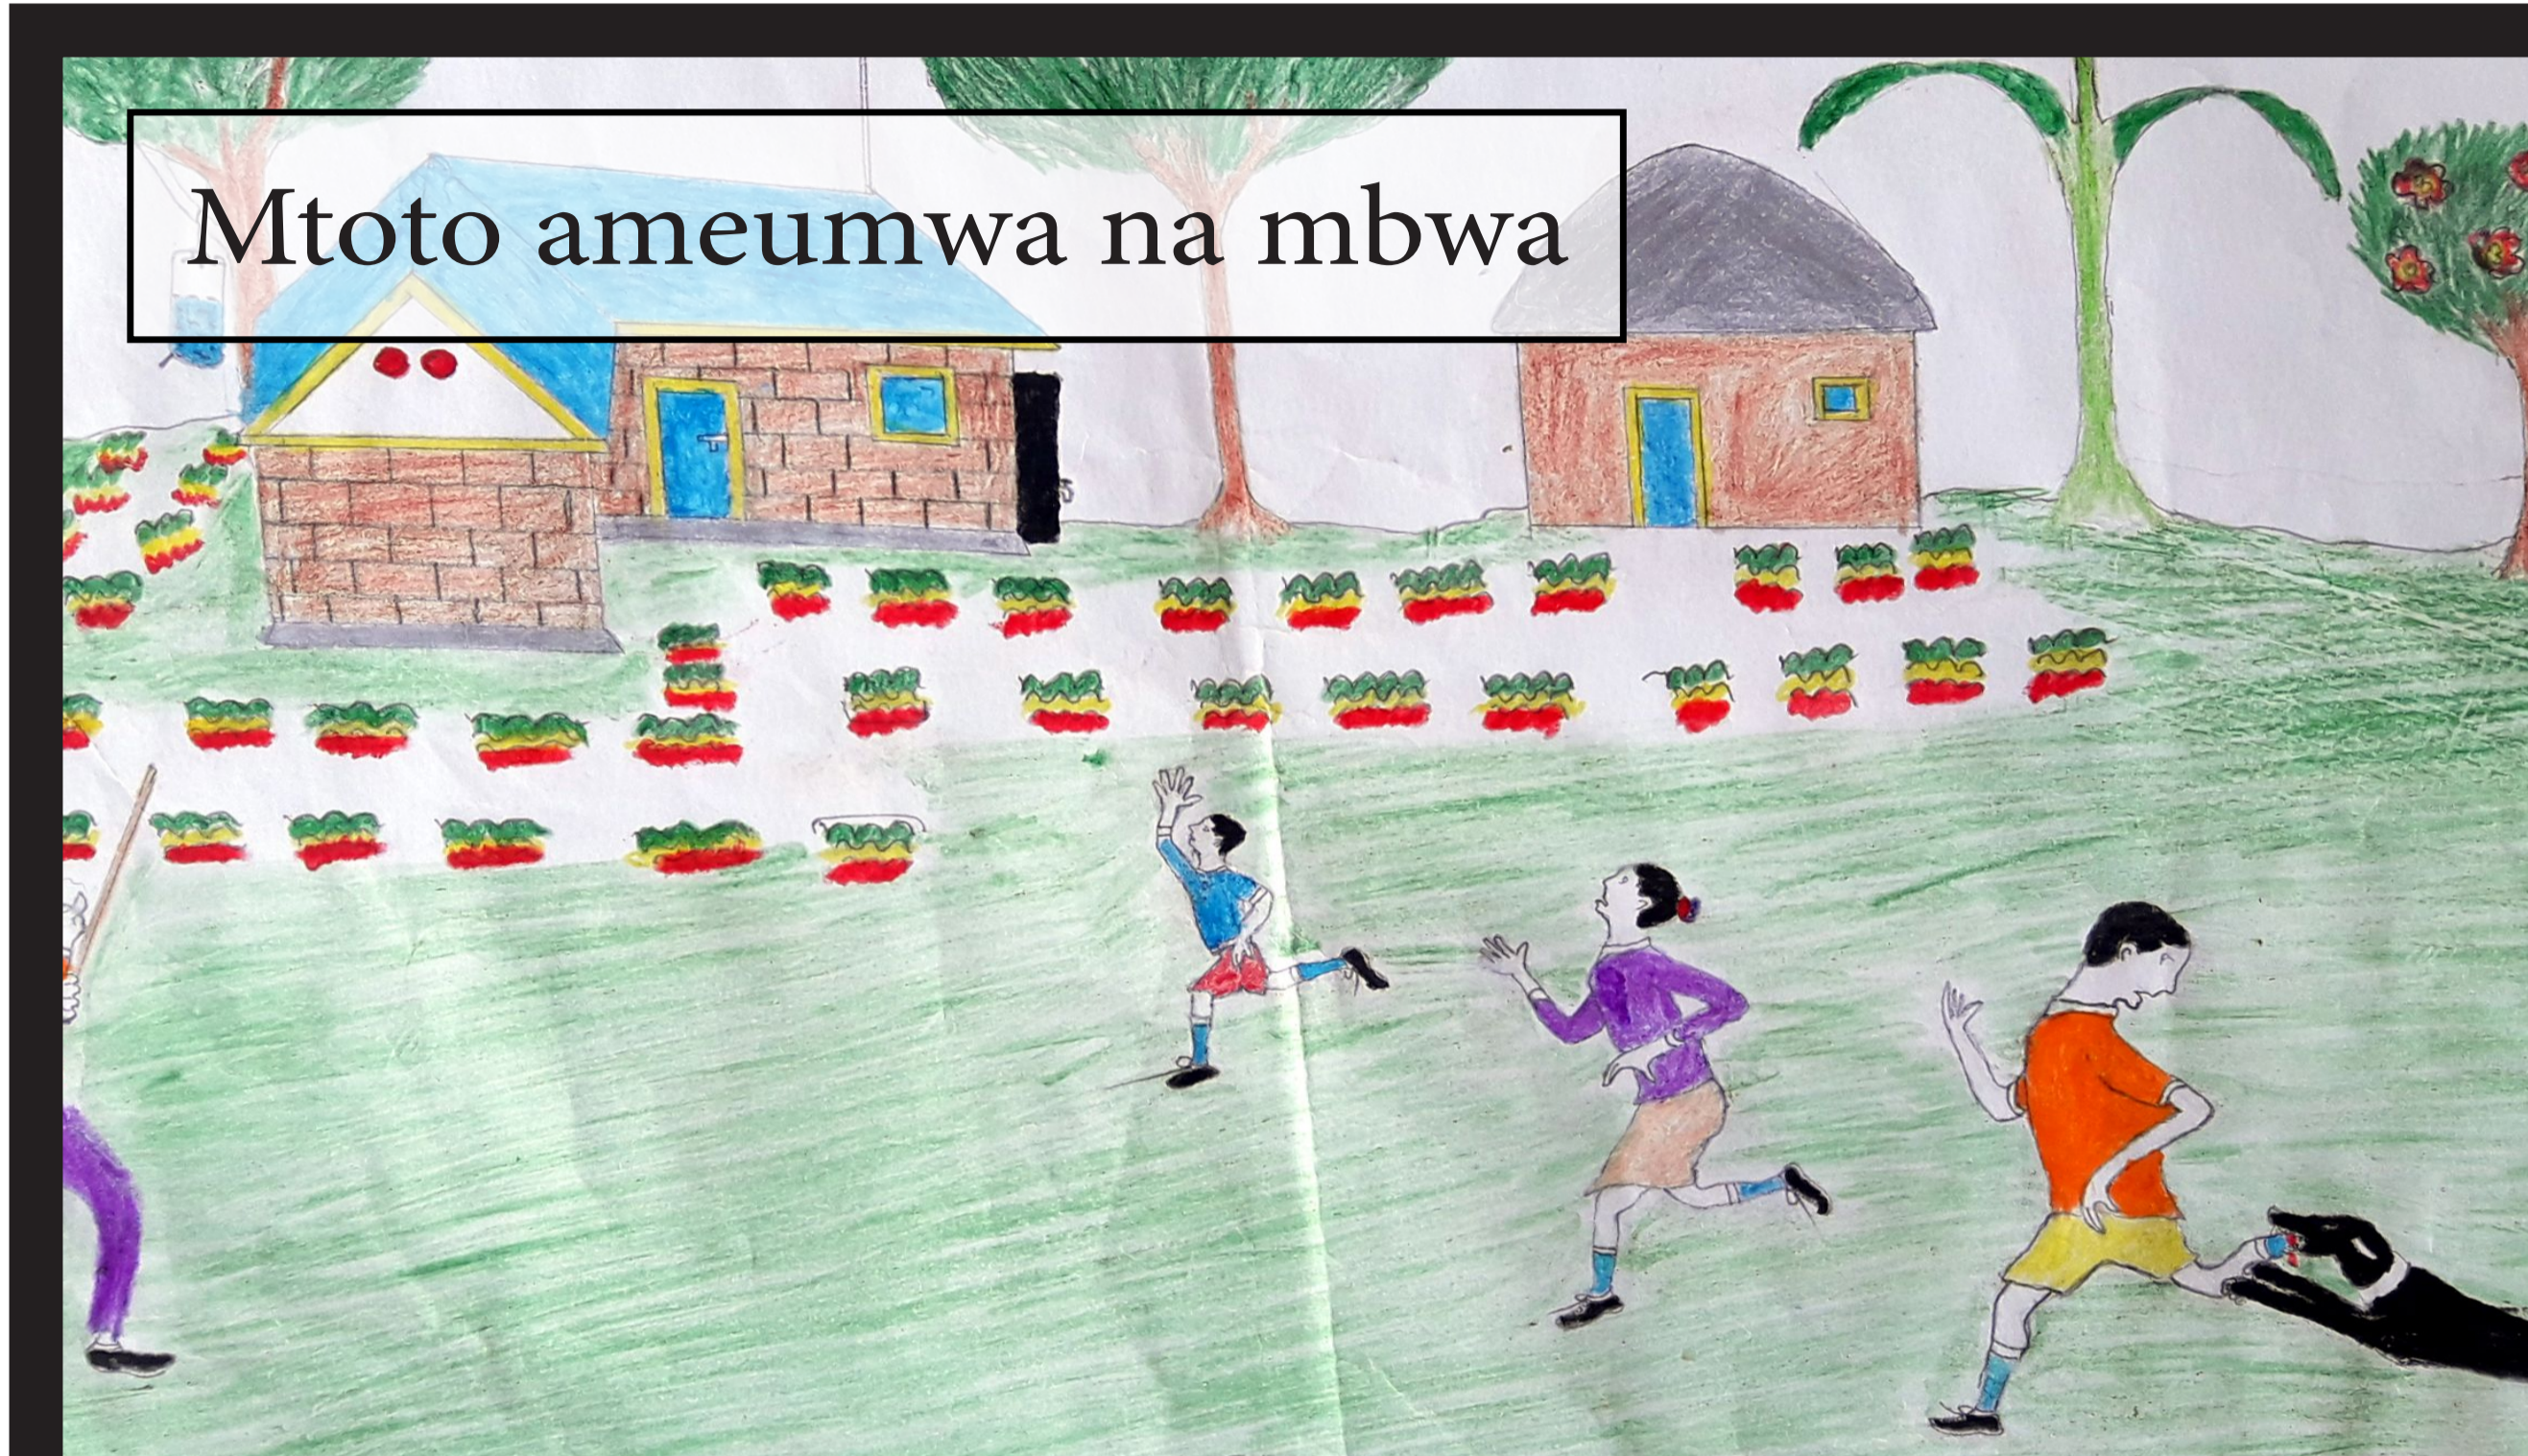

Mtoto ameumwa na mbwa

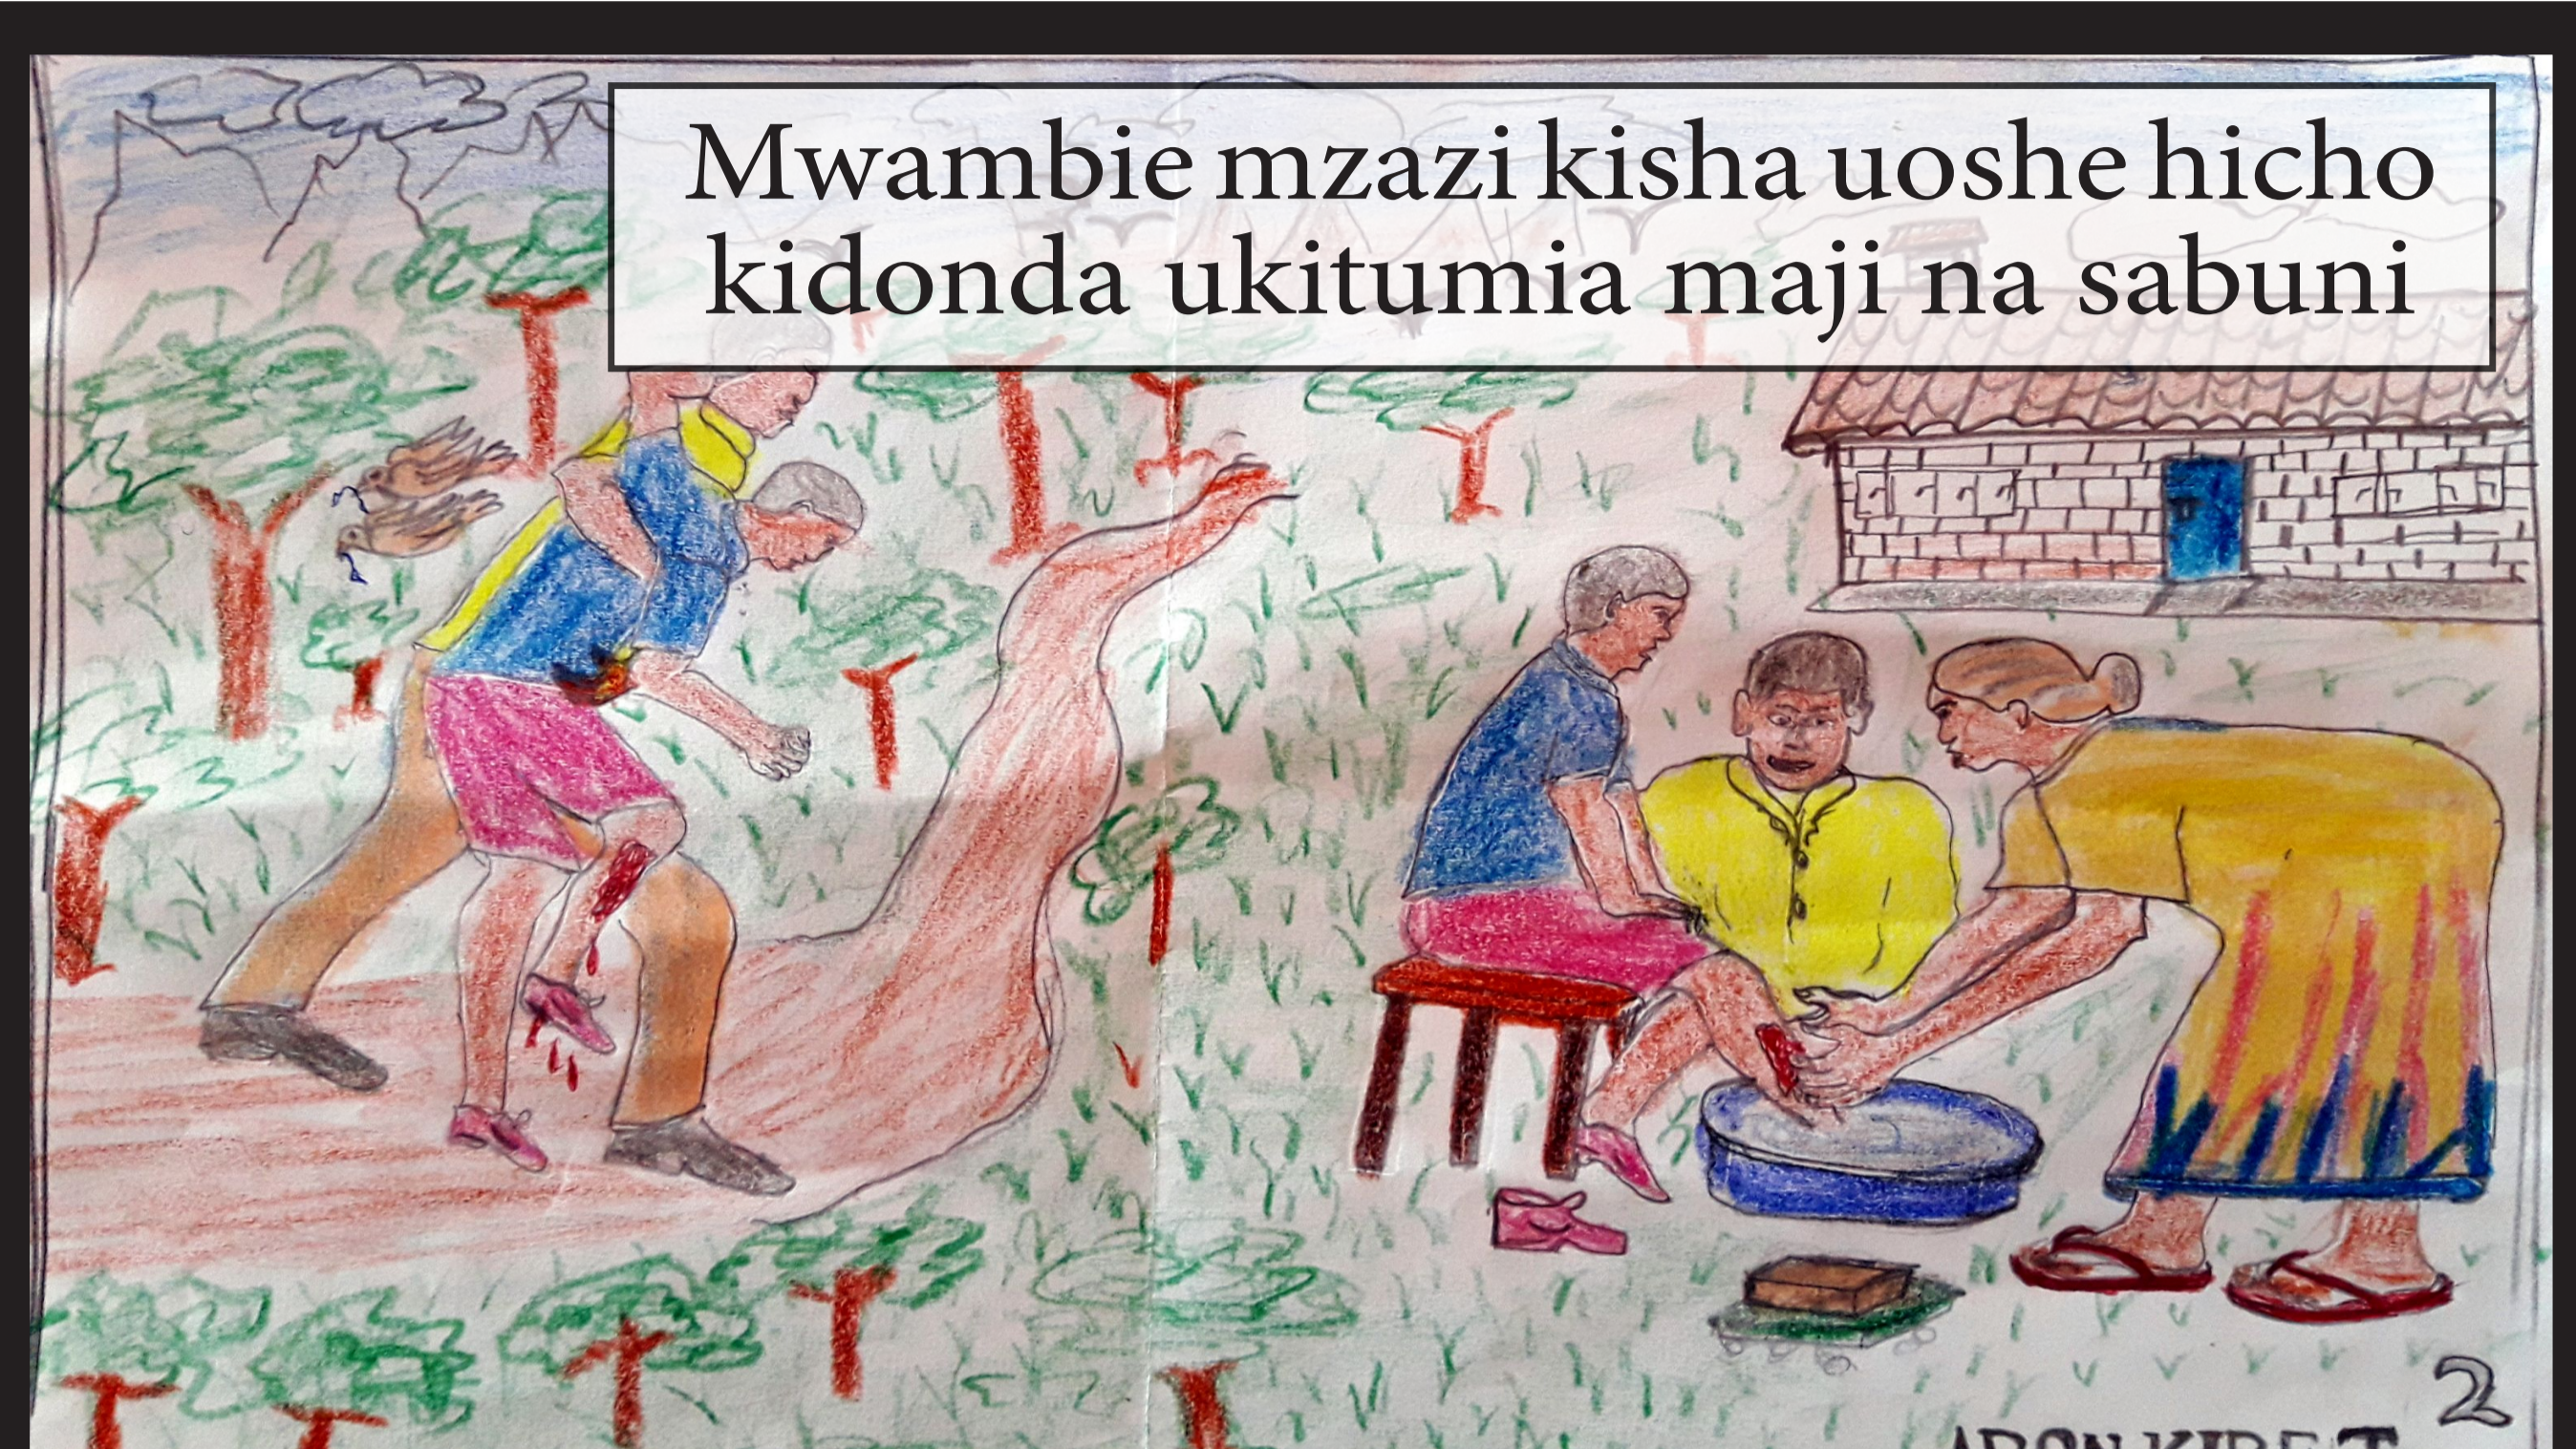

Mwambie mzazi kisha uoshe hicho kidonda ukitumia maji na sabuni

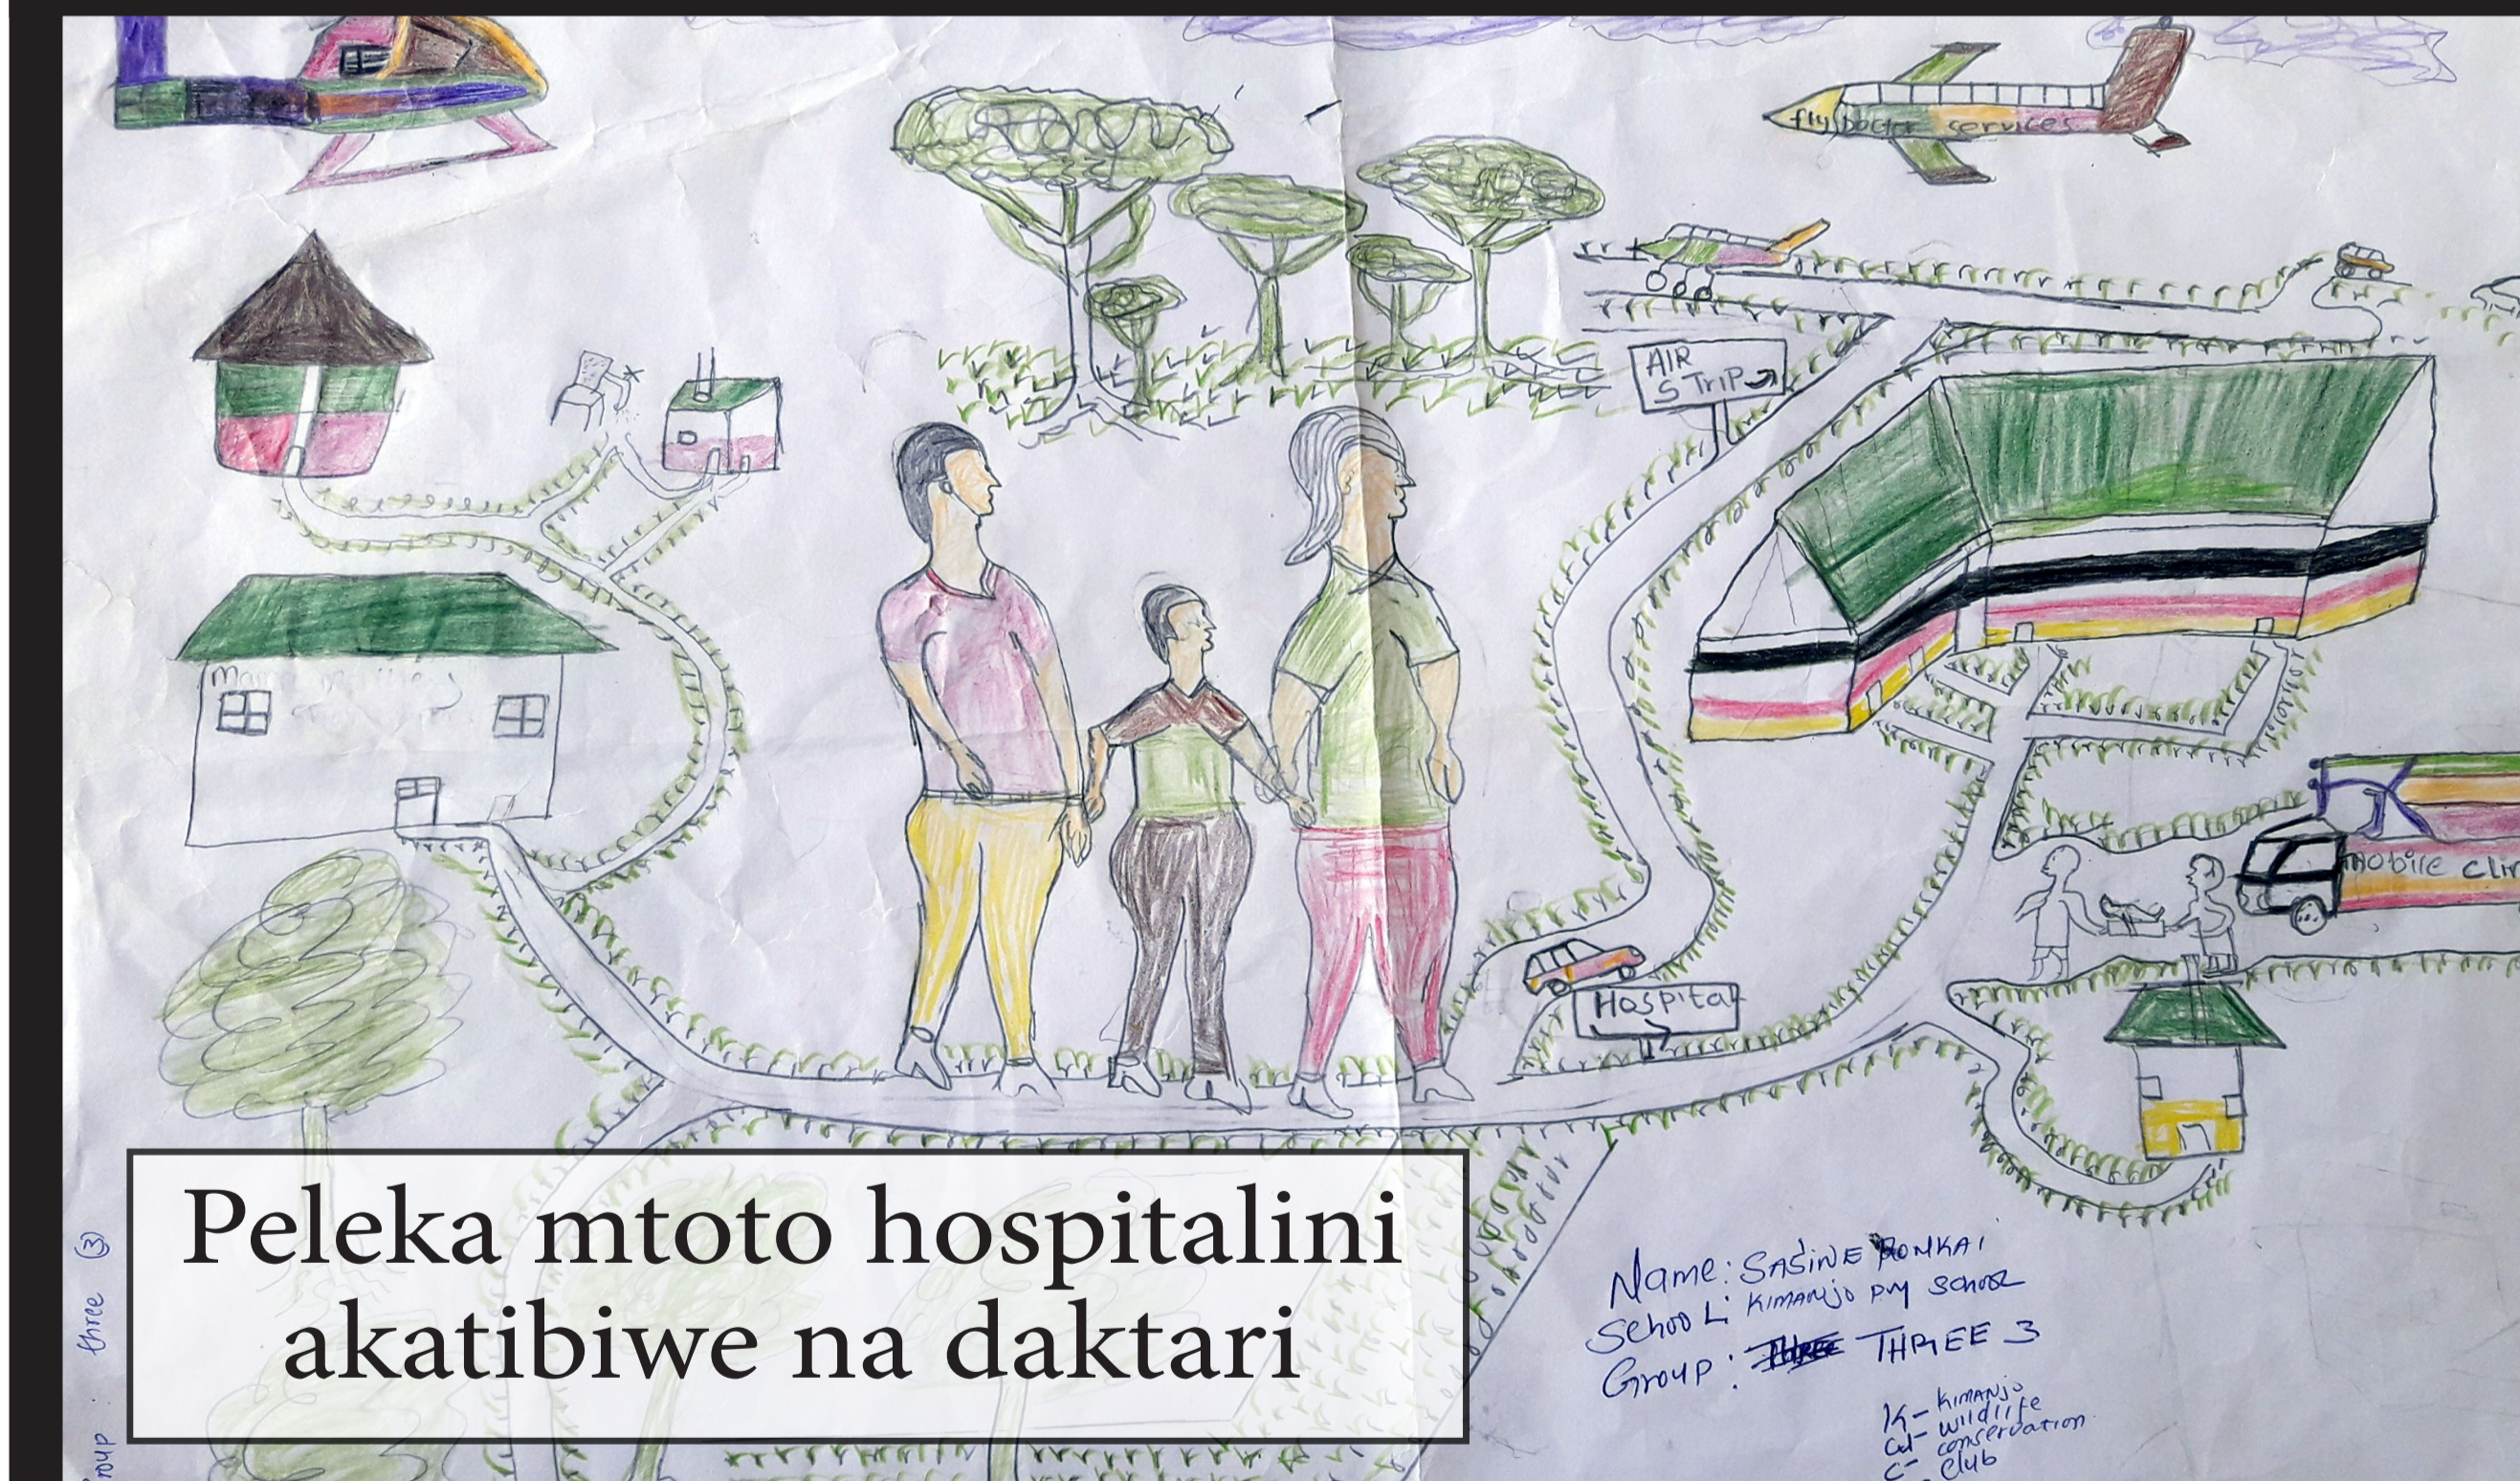

Peleka mtoto hospitalini akatibiwe na daktari

Name: SASHINE PANKAI  
 School: KIMANJA P.M. SCHOOL  
 Group: THREE 3  
 M - KIMANJA CAT CONSERVATION CLUB

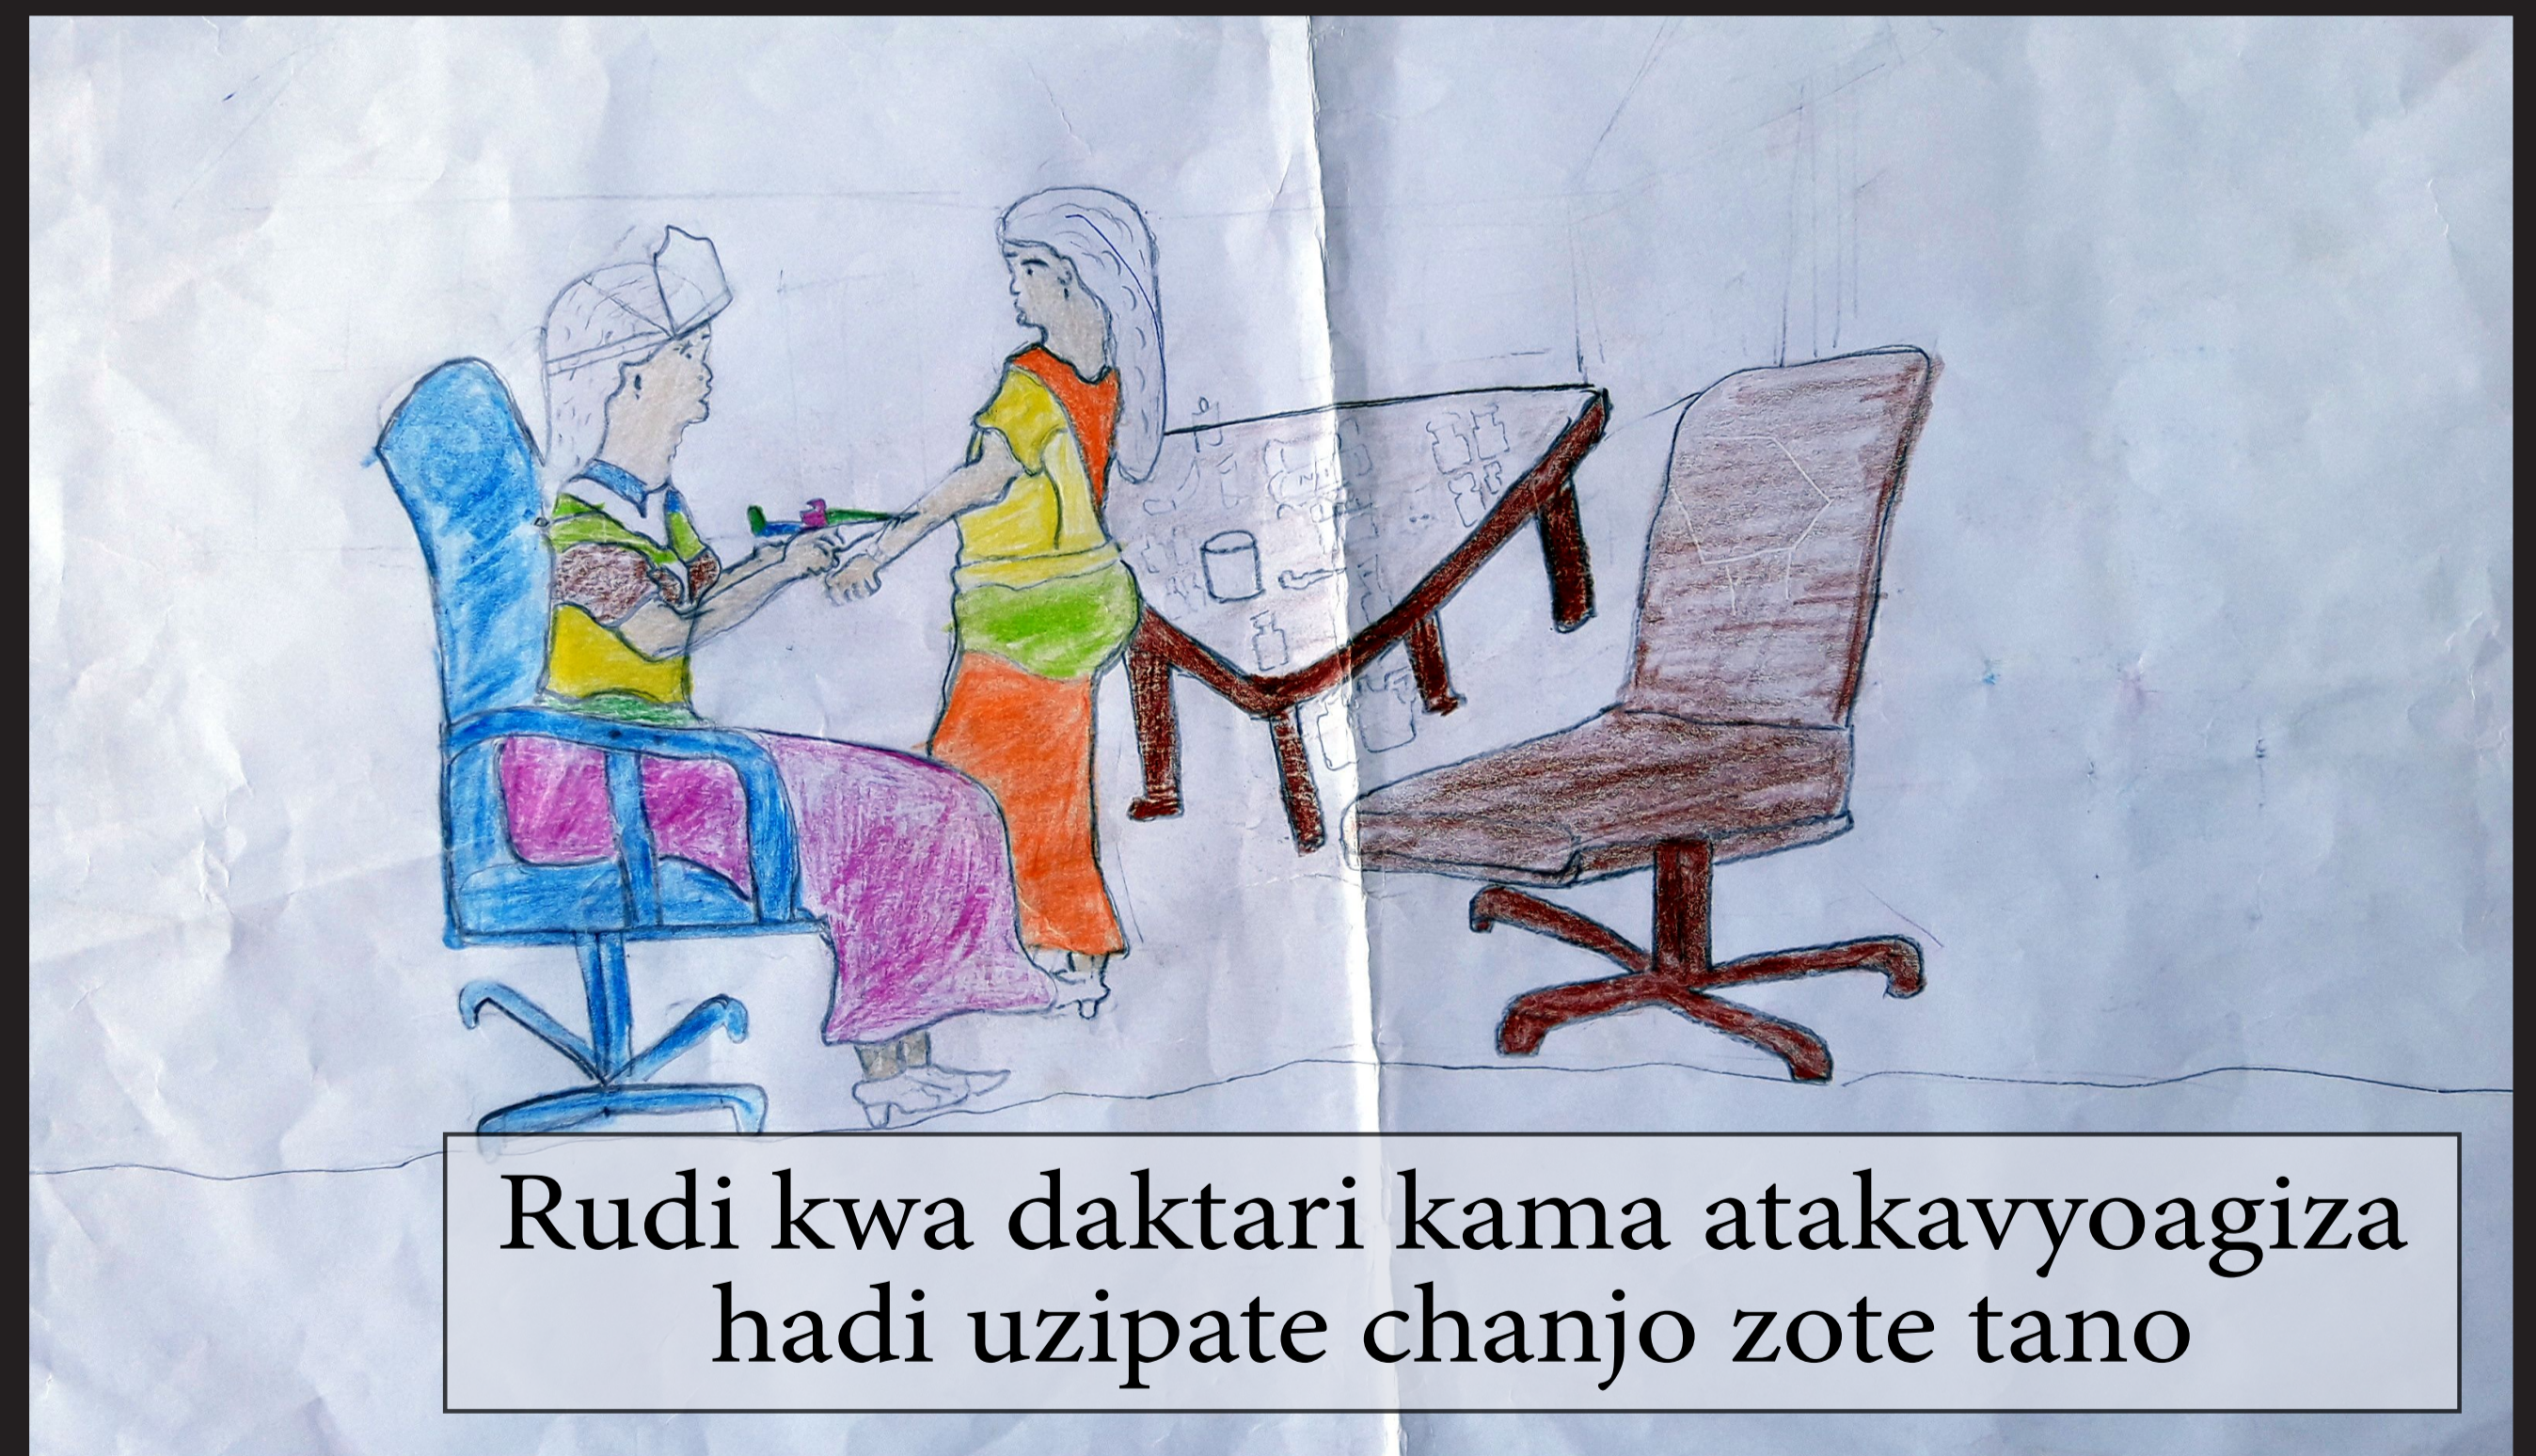

Rudi kwa daktari kama atakavyoagiza hadi uzipate chanjo zote tano
